# Supplementary material
Source: publisher figshare collection journal article supplement (https://gsapubs.figshare.com/articles/dataset/_/12420980)
Supplement: Supplementary file 1 [file 1]

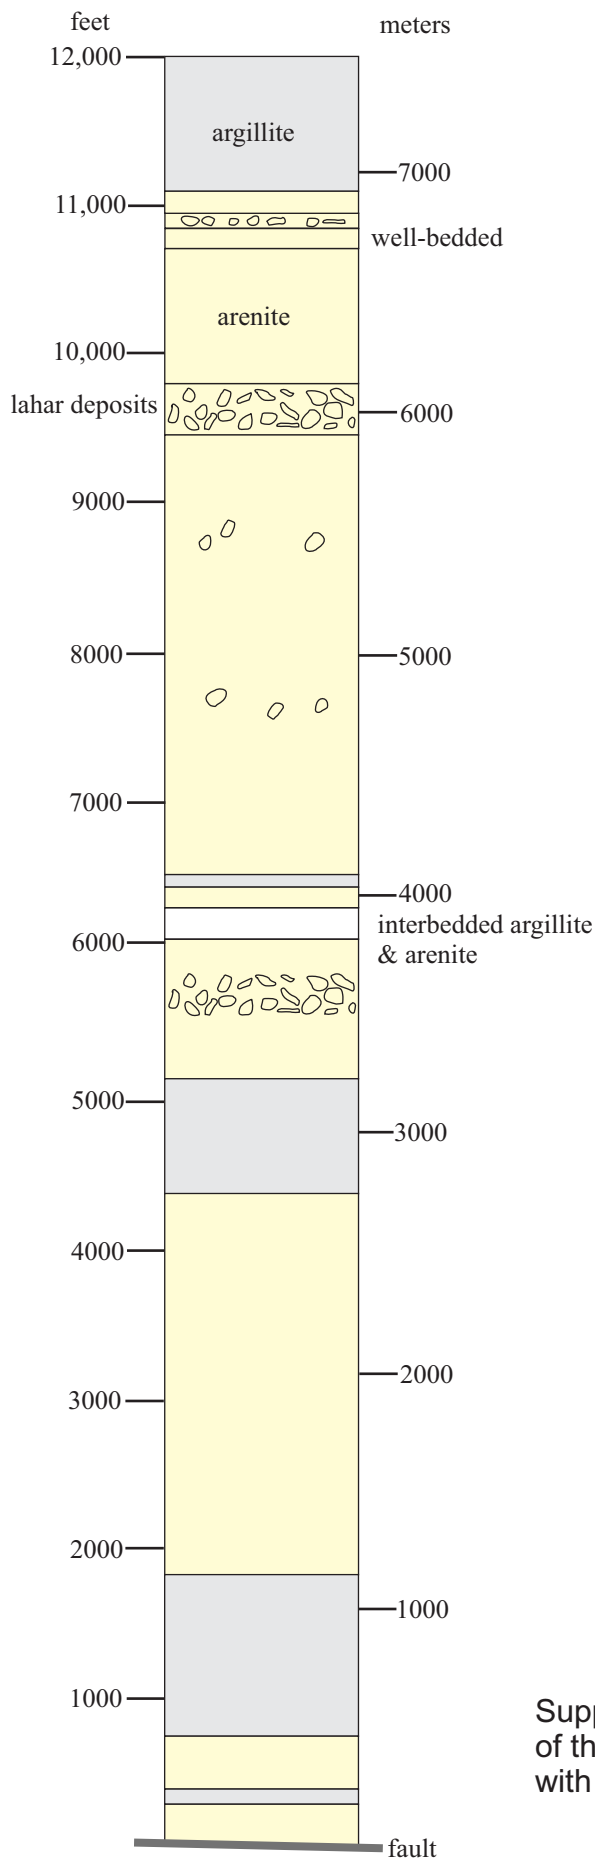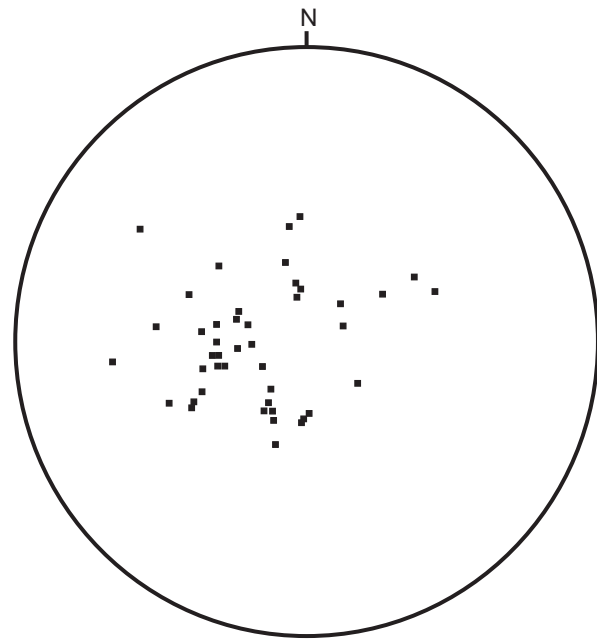

Poles to bedding, lower hemisphere projection.

Supplemental Figure S2. Representative structural section of the western Hayfork terrane in the Boise Saddle area, with lower-hemisphere stereogram of poles to bedding.
