# Supplementary material
Source: publisher figshare collection journal article supplement (https://gsapubs.figshare.com/articles/dataset/_/12420980)
Supplement: Supplementary file 2 [file 1]

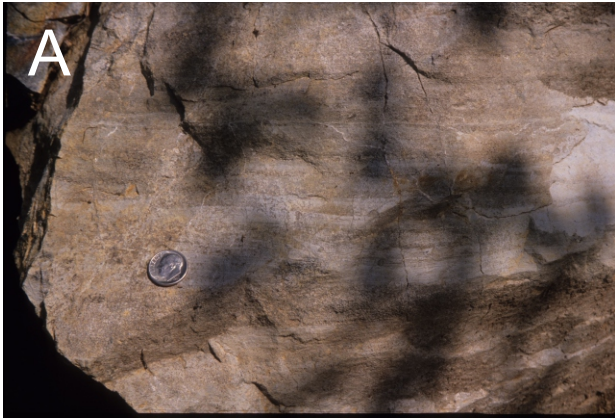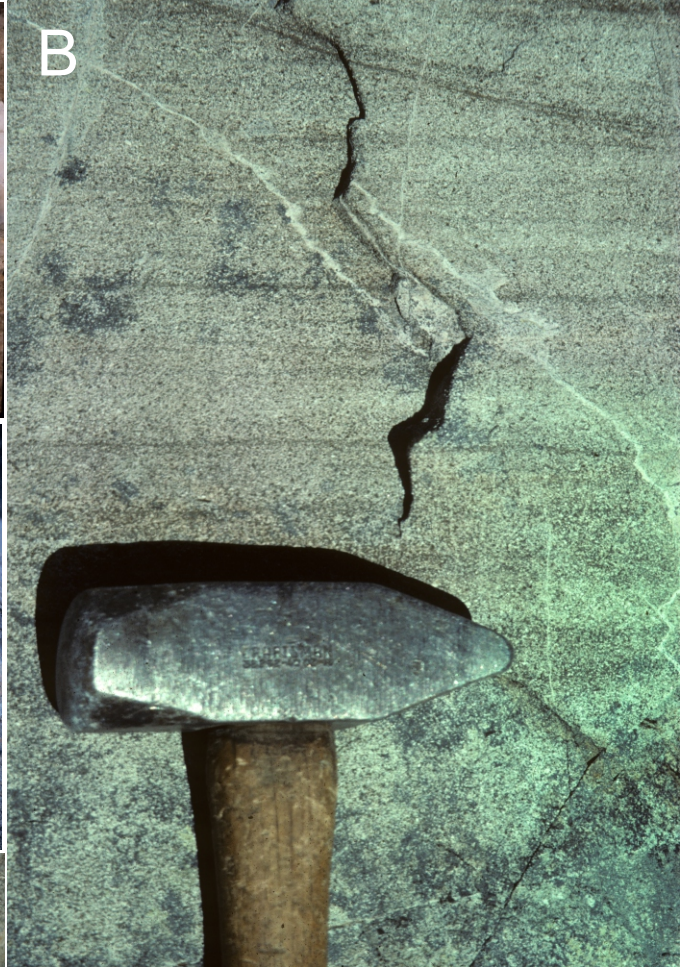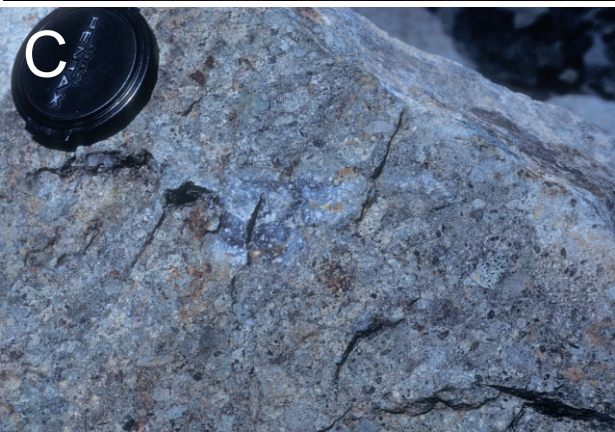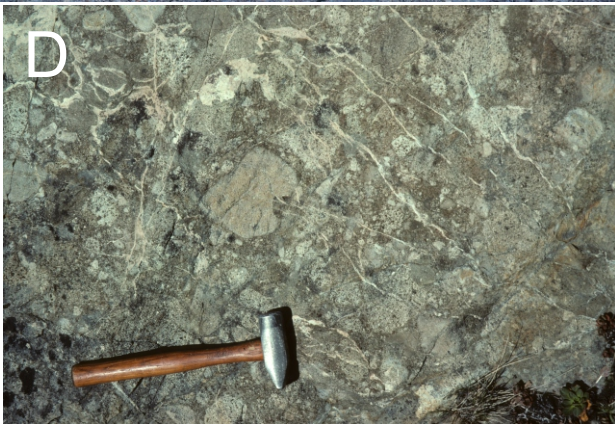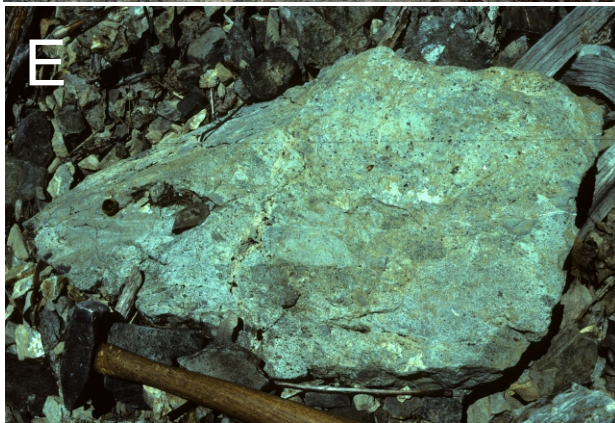

Supplemental Figure S1. Outcrop photos of western Hayfork terrane. A and B illustrate laminated crystal-lithic arenite. C, D, and E illustrate cobble-rich lahar deposits. A and C were taken along the measured section indicated in Figure 1.
